# Supplementary material for: Spectroscopic investigation of the covalence of An(iii) complexes with tetraethylcarboxamidopyridine
Source: Royal Society of Chemistry journal article supplement (doi:10.1039/d2dt00757f), 2022-01-01
Supplement: d2dt00757f1.pdf [file d2dt00757f1.pdf]

Supplementary Information for

## Spectroscopic investigation of the covalency in An(III) complexes with Picolindiamides

Thomas Sittel,<sup>\*a,b</sup> Patrik Weßling,<sup>b,a</sup> Dennis Großmann,<sup>b</sup> Eliane Engels,<sup>b</sup> Andreas Geist,<sup>a</sup> and Petra J. Panak<sup>a,b</sup>

<sup>a</sup>Karlsruhe Institute of Technology (KIT), Institute for Nuclear Waste Disposal (INE), P.O. Box 3640, 76021 Karlsruhe, Germany.

<sup>b</sup>Heidelberg University, Institute for Physical Chemistry, Im Neuenheimer Feld 234, 69120 Heidelberg, Germany

E-mail: [thomas.sittel@kit.edu](mailto:thomas.sittel@kit.edu)

### Table of Contents

|                                                                                                                                                  |    |
|--------------------------------------------------------------------------------------------------------------------------------------------------|----|
| <sup>1</sup> H, <sup>13</sup> C, <sup>15</sup> N and <sup>19</sup> F shifts for [M(Et-Pic) <sub>3</sub> ] <sup>3+</sup> and ESI-MS data .....    | 2  |
| NMR spectra of [M(Et-Pic) <sub>3</sub> ] <sup>3+</sup> .....                                                                                     | 4  |
| Comparison $\delta(^{13}\text{C})_{\text{aromat}}$ of [M(Et-Pic) <sub>3</sub> ] <sup>3+</sup> and [M(nPr-BTP) <sub>3</sub> ] <sup>3+</sup> ..... | 14 |
| Time-resolved laser fluorescence spectroscopy (TRLFS) .....                                                                                      | 14 |

## $^1\text{H}$ , $^{13}\text{C}$ , $^{15}\text{N}$ and $^{19}\text{F}$ shifts for $[\text{M}(\text{Et-Pic})_3]^{3+}$ and ESI-MS data

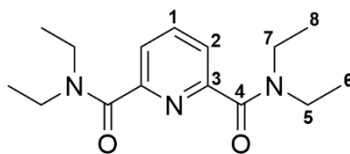

### Et-Pic

$^1\text{H}$  NMR (400.13 MHz,  $\text{CD}_3\text{CN}$ , 300 K):  $\delta$ [ppm] = 7.93 (t,  $^3\text{J}(\text{H1-H2}) = 7.8$  Hz, 1 H, H-1), 7.50 (d,  $^3\text{J}(\text{H1-H2}) = 7.8$  Hz, 2 H, H-2), 3.50 (q,  $^3\text{J}(\text{H3-H5}) = 7.4$  Hz, H-5), 3.25 (q,  $^3\text{J}(\text{H3-H5}) = 7.2$  Hz, H-6), 1.20 (q,  $^3\text{J}(\text{H3-H5}) = 7.4$  Hz, H-7), 1.09 (q,  $^3\text{J}(\text{H3-H5}) = 7.2$  Hz, H-8).

$^{13}\text{C}$  NMR (100.63 MHz,  $\text{CD}_3\text{CN}$ , 300 K):  $\delta$ [ppm] = 167.8 ( $\text{C}_q$ , C-4), 154.4 ( $\text{C}_q$ , C-3), 138.2 ( $\text{C}_s$ , C-1), 122.4 ( $\text{C}_s$ , C-2), 42.9 ( $\text{C}_s$ , C-7), 39.5 ( $\text{C}_s$ , C-5), 13.5 ( $\text{C}_p$ , C-8), 12.1 ( $\text{C}_p$ , C-6).

$^{15}\text{N}$  NMR (40.58 MHz,  $\text{CD}_3\text{CN}$ , 300 K):  $\delta$ [ppm] = 304\* ( $\text{N}_{\text{pyr}}$ ), 130\* ( $\text{R}_2\text{N-C=O}$ ).

\*values have been taken from  $^1\text{H}$ ,  $^{15}\text{N}$  HMQC.

### $[\text{Am}(\text{Et-Pic})_3](\text{NO}_3)_3$

$^1\text{H}$  NMR (400.13 MHz,  $\text{CD}_3\text{CN}$ , 300 K):  $\delta$ [ppm] = 7.87-7.75 (m, 3H, H-1/H-2), 3.60 (q,  $^3\text{J}(\text{H3-H5}) = 7.8$  Hz, 4H, H-7), 3.33 (br s, 4H, H-5), 1.21 (t,  $^3\text{J}(\text{H3-H5}) = 7.0$  Hz, 6H, H-6), 1.19 (t,  $^3\text{J}(\text{H3-H5}) = 7.8$  Hz, 6H, H-8).

$^{13}\text{C}$  NMR (100.63 MHz,  $\text{CD}_3\text{CN}$ , 300 K):  $\delta$ [ppm] = 172.3\* ( $\text{C}_q$ , C-4), 153.5 ( $\text{C}_q$ , C-3), 141.4 ( $\text{C}_s$ , C-1), 121.4 ( $\text{C}_s$ , C-2), 43.5 ( $\text{C}_s$ , C-7), 40.7 ( $\text{C}_s$ , C-5), 13.8 ( $\text{C}_p$ , C-6), 12.1 ( $\text{C}_p$ , C-8).

\*shift has been taken from  $^1\text{H}$ ,  $^{13}\text{C}$  HMBC.

$^{15}\text{N}$  NMR (40.58 MHz,  $\text{CD}_3\text{CN}$ , 300 K):  $\delta$ [ppm] = 137\* ( $\text{R}_2\text{N-C=O}$ ).

\*value has been taken from  $^1\text{H}$ ,  $^{15}\text{N}$  HMQC.

Radiolytic degradation: NMR measurements of the Am(III) sample were conducted over the course of approx. seven days. By repeatedly acquiring  $^1\text{H}$  NMR spectra, a potential radiolytic degradation of the ligand could be excluded.

### $[\text{La}(\text{Et-Pic})_3](\text{OTf})_3$

$^1\text{H}$  NMR (400.13 MHz,  $\text{CD}_3\text{CN}$ , 300 K):  $\delta$ [ppm] = 8.24 (t,  $^3\text{J}(\text{H1-H2}) = 7.8$  Hz, 1H, H-1), 7.91 (d,  $^3\text{J}(\text{H1-H2}) = 7.8$  Hz, 2H, H-2), 3.60 (q,  $^3\text{J}(\text{H3-H5}) = 7.2$  Hz, 4H, H-7), 3.33 (q,  $^3\text{J}(\text{H3-H5}) = 7.2$  Hz, 4H, H-5), 1.32 (t,  $^3\text{J}(\text{H3-H5}) = 7.2$  Hz, 6H, H-8), 1.02 (t,  $^3\text{J}(\text{H3-H5}) = 7.2$  Hz, 6H, H-6).

$^{13}\text{C}$  NMR (100.63 MHz,  $\text{CD}_3\text{CN}$ , 300 K):  $\delta$ [ppm] = 169.1 ( $\text{C}_q$ , C-4), 150.5 ( $\text{C}_q$ , C-3), 141.2 ( $\text{C}_s$ , C-1), 126.1 ( $\text{C}_s$ , C-2), 44.4 ( $\text{C}_s$ , C-7), 42.0 ( $\text{C}_s$ , C-5), 13.2 ( $\text{C}_p$ , C-8), 11.4 ( $\text{C}_p$ , C-6).

$^{15}\text{N}$  NMR (40.58 MHz,  $\text{CD}_3\text{CN}$ , 300 K):  $\delta$ [ppm] = 299\* ( $\text{N}_{\text{pyr}}$ ), 143\* ( $\text{R}_2\text{N-C=O}$ ).

\*values have been taken from  $^1\text{H}$ ,  $^{15}\text{N}$ -HMQC.

$^{19}\text{F}$  NMR (376.50 MHz,  $\text{CD}_3\text{CN}$ , 300 K):  $\delta$ [ppm] = -79.29 ( $\text{CF}_3\text{SO}_3^-$ ).

### MS (ESI<sup>+</sup>, MeOH)

[La(Et-Pic)<sub>3</sub>(OTf)]<sup>2+</sup> = LaC<sub>46</sub>H<sub>69</sub>N<sub>9</sub>O<sub>9</sub>SF<sub>3</sub>, calculated: 559.6973, found: 559.6976,

[La(Et-Pic)<sub>2</sub>(OTf)(MeO)]<sup>+</sup> = LaC<sub>32</sub>H<sub>49</sub>N<sub>6</sub>O<sub>8</sub>SF<sub>3</sub>, calculated: 873.2339, found: 873.2359,

[La(Et-Pic)<sub>2</sub>(OTf)<sub>2</sub>]<sup>+</sup> = LaC<sub>32</sub>H<sub>46</sub>N<sub>6</sub>O<sub>10</sub>S<sub>2</sub>F<sub>6</sub>, calculated: 991.1675, found: 991.1692.

### [Sm(Et-Pic)<sub>3</sub>](OTf)<sub>3</sub>

<sup>1</sup>H NMR (400.13 MHz, CD<sub>3</sub>CN, 300 K): δ[ppm] = 8.45 (br. s, 1H, H-1), 8.14 (br. s, 2H, H-2), 3.65 (br. s, 4H, H-7), 3.23 (br. s, 4H, H-5), 1.36 (t, <sup>3</sup>J(H3-H5) = 6.7 Hz, 6H, H-8), 0.84 (br. t, 6H, H-6).

<sup>13</sup>C NMR (100.63 MHz, CD<sub>3</sub>CN, 300 K): δ[ppm] = 171.0 (C<sub>q</sub>, C-4), 151.0 (C<sub>q</sub>, C-3), 142.3 (C<sub>s</sub>, C-1), 126.4 (C<sub>s</sub>, C-2), 44.5 (C<sub>s</sub>, C-7), 42.7 (C<sub>s</sub>, C-5), 13.2 (C<sub>p</sub>, C-8), 11.3 (C<sub>p</sub>, C-6).

<sup>15</sup>N NMR (40.58 MHz, CD<sub>3</sub>CN, 300 K): δ[ppm] = 144\* (R<sub>2</sub>N-C=O).

\*value has been taken from <sup>1</sup>H, <sup>15</sup>N-HMQC.

<sup>19</sup>F NMR (376.50 MHz, CD<sub>3</sub>CN, 300 K): δ[ppm] = -79.28 (CF<sub>3</sub>SO<sub>3</sub><sup>-</sup>).

### MS (ESI<sup>+</sup>, MeOH)

[Sm(Et-Pic)<sub>3</sub>(OTf)]<sup>2+</sup> = SmC<sub>46</sub>H<sub>69</sub>N<sub>9</sub>O<sub>9</sub>SF<sub>3</sub>, calculated: 566.2044, found: 566.2048,

[Sm(Et-Pic)<sub>2</sub>(OTf)(MeO)]<sup>+</sup> = SmC<sub>32</sub>H<sub>49</sub>N<sub>6</sub>O<sub>8</sub>SF<sub>3</sub>, calculated: 886.2482, found: 886.2498,

[Sm(Et-Pic)<sub>2</sub>(OTf)<sub>2</sub>]<sup>+</sup> = SmC<sub>32</sub>H<sub>46</sub>N<sub>6</sub>O<sub>10</sub>S<sub>2</sub>F<sub>6</sub>, calculated: 1004.1817, found: 1004.1836.

### [Lu(Et-Pic)<sub>3</sub>](OTf)<sub>3</sub>

<sup>1</sup>H NMR (400.13 MHz, CD<sub>3</sub>CN, 300 K): δ[ppm] = 8.36 (t, <sup>3</sup>J(H1-H2) = 7.8 Hz, 1H, H-1), 8.08 (d, <sup>3</sup>J(H1-H2) = 7.8 Hz, 2H, H-2), 3.76-3.70 (m, 4H, H-7), 3.35-3.25 (m, 2H, H-5a), 3.17-3.08 (m, 2H, H-5b), 1.40 (t, <sup>3</sup>J(H3-H5) = 7.2 Hz, 6H, H-8), 0.87 (t, <sup>3</sup>J(H3-H5) = 7.2 Hz, 6H, H-6).

<sup>13</sup>C NMR (100.63 MHz, CD<sub>3</sub>CN, 300 K): δ[ppm] = 168.4 (C<sub>q</sub>, C-4), 148.0 (C<sub>q</sub>, C-3), 141.8 (C<sub>s</sub>, C-1), 127.5 (C<sub>s</sub>, C-2), 44.8 (C<sub>s</sub>, C-7), 43.5 (C<sub>s</sub>, C-5), 13.2 (C<sub>p</sub>, C-8), 11.4 (C<sub>p</sub>, C-6).

<sup>15</sup>N NMR (40.58 MHz, CD<sub>3</sub>CN, 300 K): δ[ppm] = 297\* (N<sub>pyr</sub>), 144\* (R<sub>2</sub>N-C=O).

\*shifts have been taken from <sup>1</sup>H, <sup>15</sup>N-HMQC.

<sup>19</sup>F NMR (376.50 MHz, CD<sub>3</sub>CN, 300 K): δ[ppm] = -79.28 (CF<sub>3</sub>SO<sub>3</sub><sup>-</sup>).

### MS (ESI<sup>+</sup>, MeOH)

[Lu(Et-Pic)<sub>3</sub>(OTf)]<sup>2+</sup> = LuC<sub>46</sub>H<sub>69</sub>N<sub>9</sub>O<sub>9</sub>SF<sub>3</sub>, calculated: 577.7150, found: 577.7148,

[Lu(Et-Pic)<sub>2</sub>(OTf)(MeO)]<sup>+</sup> = LuC<sub>32</sub>H<sub>49</sub>N<sub>6</sub>O<sub>8</sub>SF<sub>3</sub>, calculated: 909.2692, found: 909.2700,

[Lu(Et-Pic)<sub>2</sub>(OTf)<sub>2</sub>]<sup>+</sup> = LuC<sub>32</sub>H<sub>46</sub>N<sub>6</sub>O<sub>10</sub>S<sub>2</sub>F<sub>6</sub>, calculated: 1027.2029, found: 1027.2034.

## [Y(Et-Pic)<sub>3</sub>](OTf)<sub>3</sub>

<sup>1</sup>H NMR (400.13 MHz, CD<sub>3</sub>CN, 300 K): δ[ppm] = 8.34 (t, <sup>3</sup>J(H1-H2) = 8.0 Hz, 1H, H-1), 8.06 (d, <sup>3</sup>J(H1-H2) = 8.0 Hz, 2H, H-2), 3.75-3.68 (br. m, 4H, H-7), 3.36-3.27 (br. m, 2H, H-5a), 3.20-3.11 (br. m, 2H, H-5b), 1.39 (t, <sup>3</sup>J(H3-H5) = 7.2 Hz, 6H, H-8), 0.90 (t, <sup>3</sup>J(H3-H5) = 7.2 Hz, 6H, H-6).

<sup>13</sup>C NMR (100.63 MHz, CD<sub>3</sub>CN, 300 K): δ[ppm] = 168.2 (C<sub>q</sub>, C-4), 148.5 (C<sub>q</sub>, C-3), 141.9 (C<sub>s</sub>, C-1), 127.2 (C<sub>s</sub>, C-2), 44.8 (C<sub>s</sub>, C-7), 43.3 (C<sub>s</sub>, C-5), 13.2 (C<sub>p</sub>, C-8), 11.4 (C<sub>p</sub>, C-6).

<sup>15</sup>N NMR (40.58 MHz, CD<sub>3</sub>CN, 300 K): δ[ppm] = 297\* (N<sub>pyr</sub>), 146\* (R<sub>2</sub>N-C=O).

\*values have been taken from <sup>1</sup>H, <sup>15</sup>N-HMQC.

<sup>19</sup>F NMR (376.50 MHz, CD<sub>3</sub>CN, 300 K): δ[ppm] = -79.28 (CF<sub>3</sub>SO<sub>3</sub><sup>-</sup>).

## MS (ESI<sup>+</sup>, MeOH)

[Y(Et-Pic)<sub>3</sub>(OTf)]<sup>2+</sup> = YC<sub>46</sub>H<sub>69</sub>N<sub>9</sub>O<sub>9</sub>SF<sub>3</sub>, calculated: 534.6975, found: 534.6972,

[Y(Et-Pic)<sub>2</sub>(OTf)(MeO)]<sup>+</sup> = YC<sub>32</sub>H<sub>49</sub>N<sub>6</sub>O<sub>8</sub>SF<sub>3</sub>, calculated: 823.2343, found: 823.2348,

[Y(Et-Pic)<sub>2</sub>(OTf)<sub>2</sub>]<sup>+</sup> = YC<sub>32</sub>H<sub>46</sub>N<sub>6</sub>O<sub>10</sub>S<sub>2</sub>F<sub>6</sub>, calculated: 941.1679, found: 941.1683.

## NMR spectra of [M(Et-Pic)<sub>3</sub>]<sup>3+</sup>

### [Am(Et-Pic)<sub>3</sub>](NO<sub>3</sub>)<sub>3</sub>

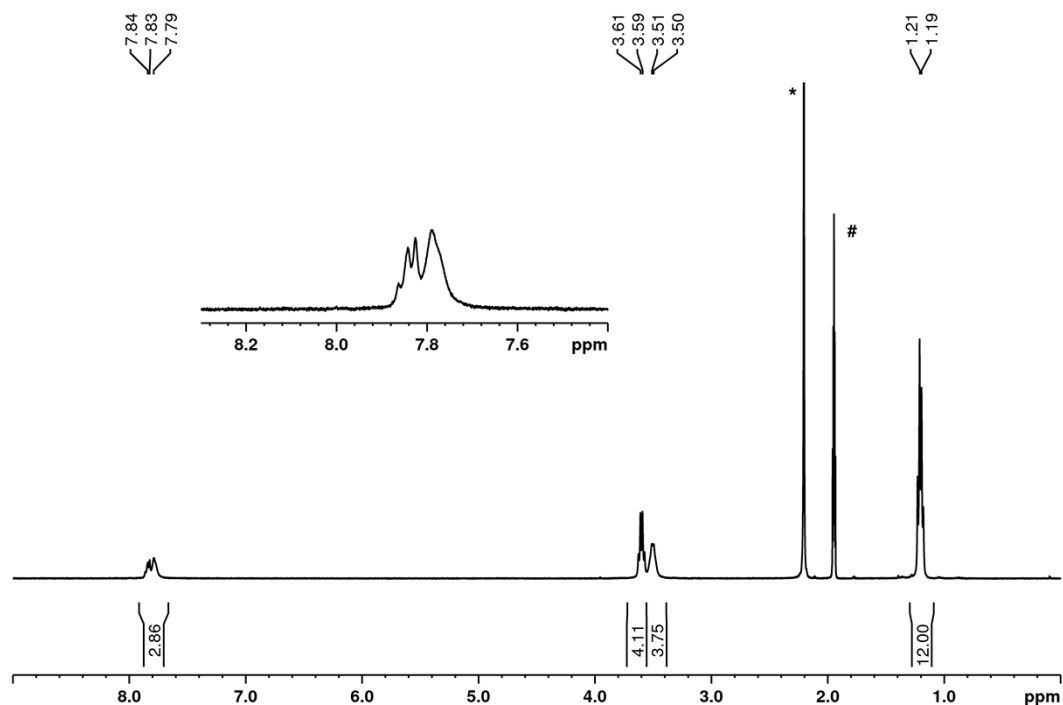

**Figure S1** <sup>1</sup>H NMR spectrum (400.18 MHz, 300 K) of [Am(Et-Pic)<sub>3</sub>](NO<sub>3</sub>)<sub>3</sub> ([Am] = 6.8 mmol/L) in CD<sub>3</sub>CN (\* δ(H<sub>2</sub>O); # δ(CD<sub>3</sub>CN)).

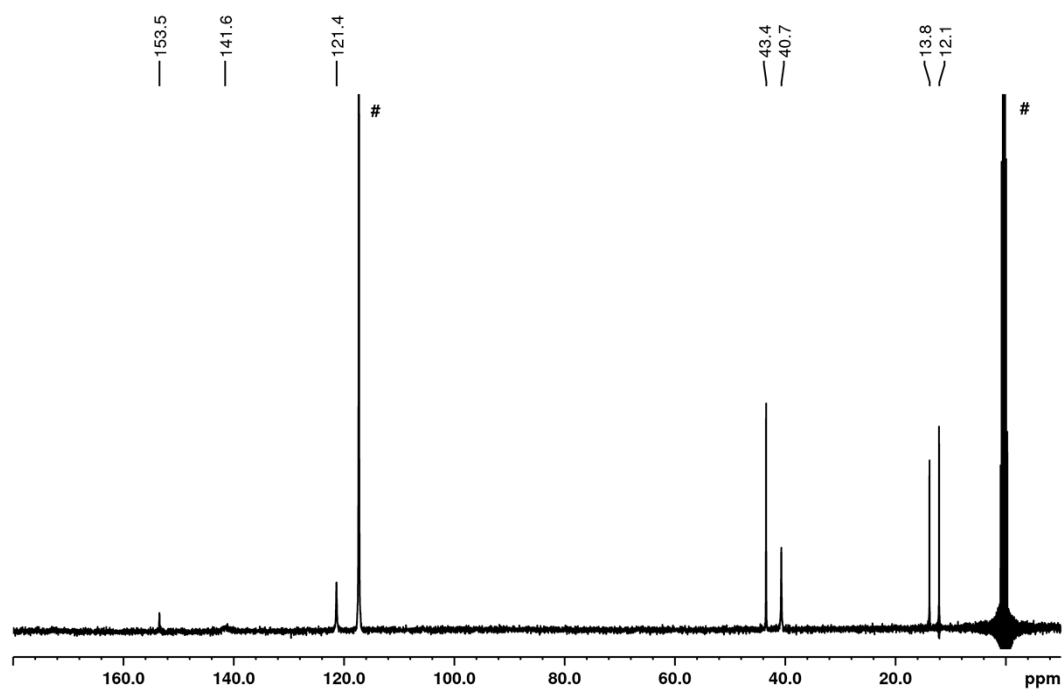

Figure S2  $^{13}\text{C}$  NMR spectrum (100.63 MHz, 300 K) of  $[\text{Am}(\text{Et-Pic})_3](\text{NO}_3)_3$  ( $[\text{Am}] = 6.8 \text{ mmol/L}$ ) in  $\text{CD}_3\text{CN}$  (#  $\delta(\text{CD}_3\text{CN})$ ).

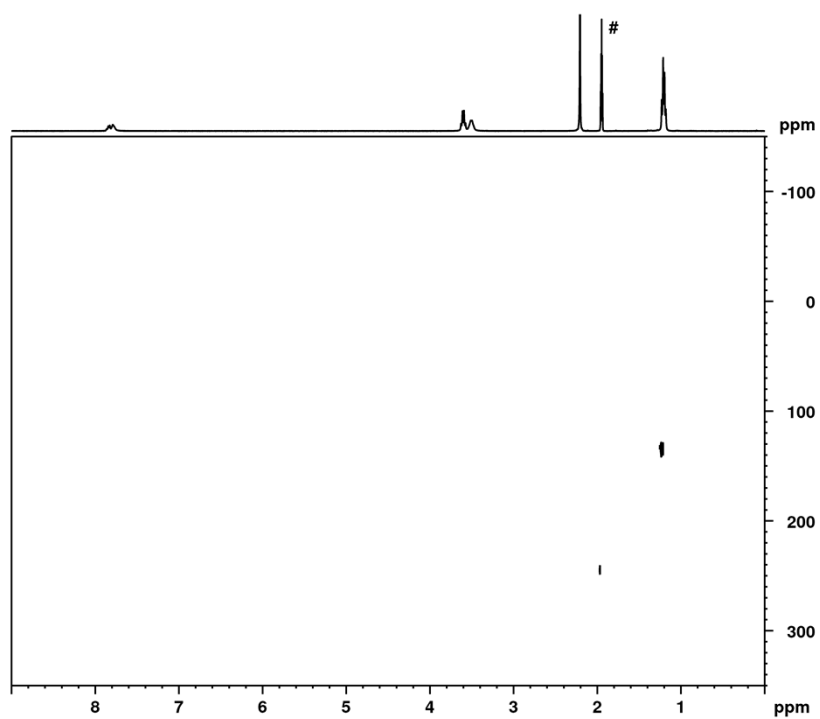

Figure S3  $^1\text{H}/^{15}\text{N}$  HMQC spectrum of  $[\text{Am}(\text{Et-Pic})_3](\text{NO}_3)_3$  ( $[\text{Am}] = 6.8 \text{ mmol/L}$ ) in  $\text{CD}_3\text{CN}$  (#  $\delta(\text{CD}_3\text{CN})$ ).

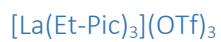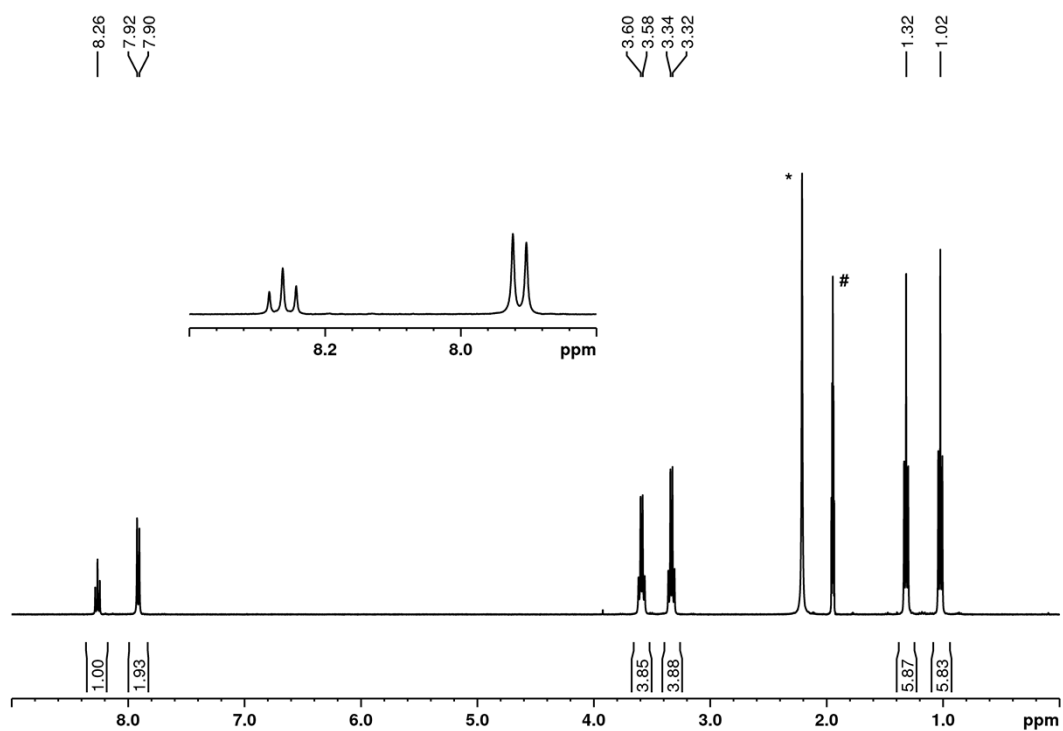

Figure S4 <sup>1</sup>H NMR spectrum (400.18 MHz, 300 K) of [La(Et-Pic)<sub>3</sub>](OTf)<sub>3</sub> ([La] = 10 mmol/L) in CD<sub>3</sub>CN (\* δ(H<sub>2</sub>O); # δ(CD<sub>3</sub>CN)).

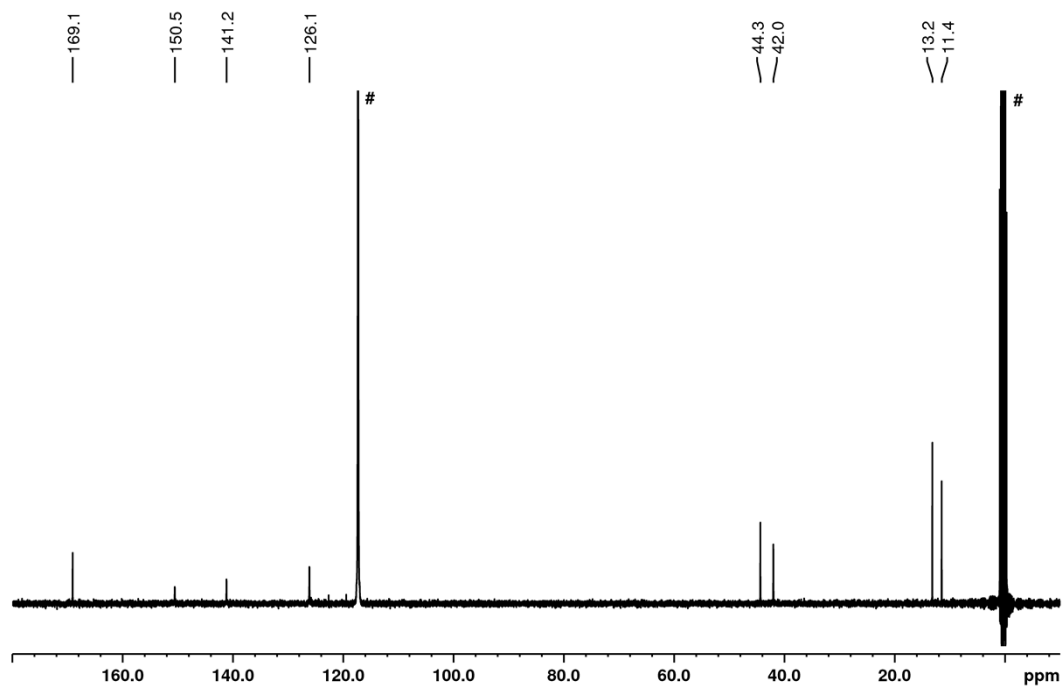

Figure S5 <sup>13</sup>C NMR spectrum (100.63 MHz, 300 K) of [La(Et-Pic)<sub>3</sub>](OTf)<sub>3</sub> ([La] = 10 mmol/L) in CD<sub>3</sub>CN (# δ(CD<sub>3</sub>CN)).

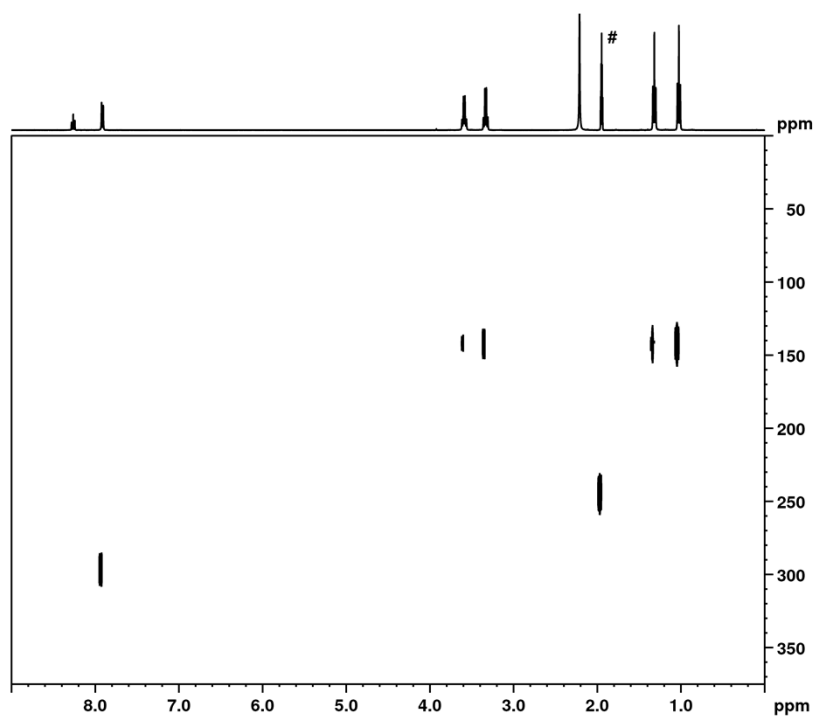

**Figure S6**  $^1\text{H}/^{15}\text{N}$  HMQC spectrum of  $[\text{La}(\text{Et-Pic})_3](\text{OTf})_3$  ( $[\text{La}] = 10 \text{ mmol/L}$  in  $\text{CD}_3\text{CN}$  ( $\delta(\text{CD}_3\text{CN})$ )).

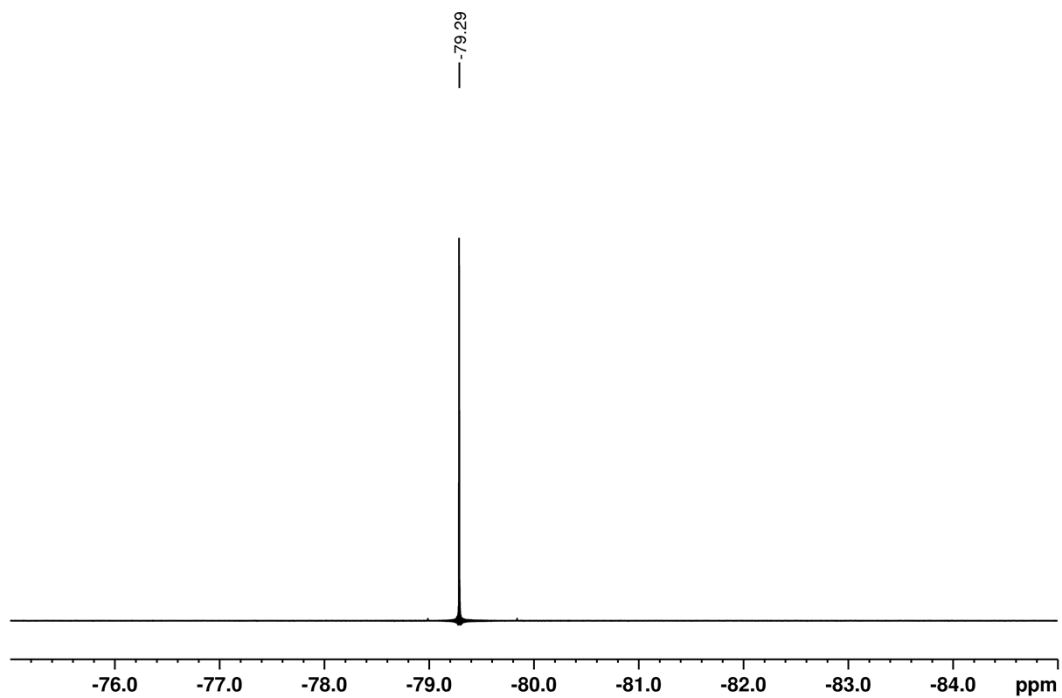

**Figure S7**  $^{19}\text{F}$  NMR spectrum (376.50 MHz, 300 K) of the  $\text{OTf}^-$  anion of  $[\text{La}(\text{Et-Pic})_3](\text{OTf})_3$  ( $[\text{La}] = 10 \text{ mmol/L}$  in  $\text{CD}_3\text{CN}$ ).

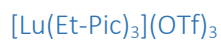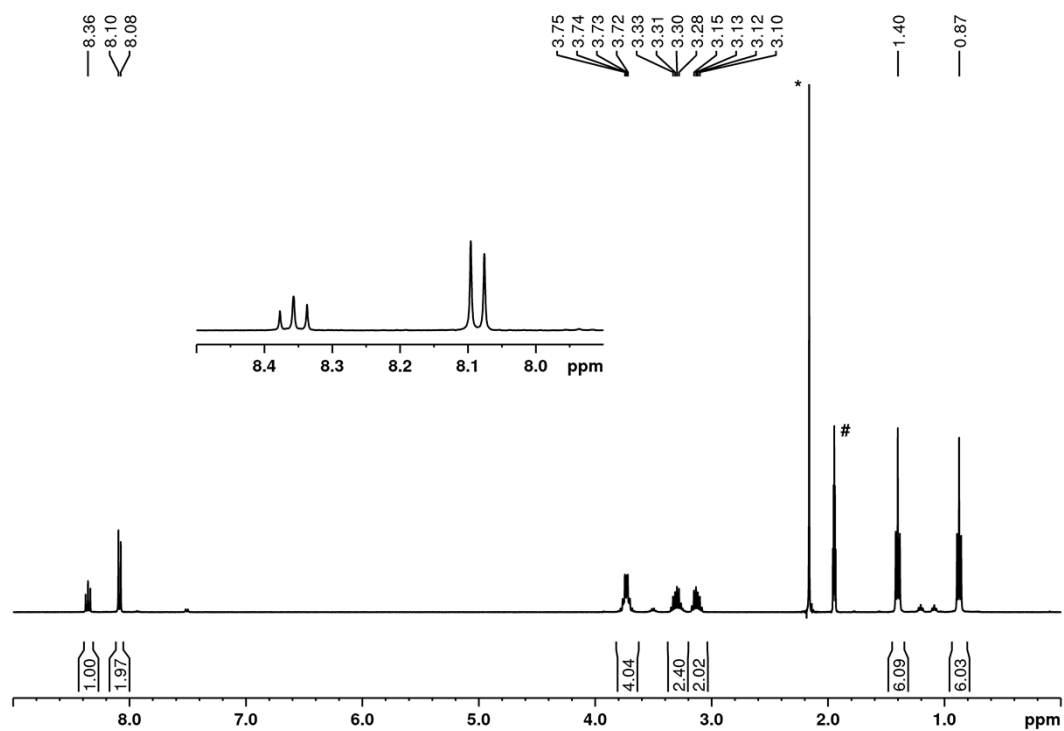

Figure S8 <sup>1</sup>H NMR spectrum (400.18 MHz, 300 K) of [Lu(Et-Pic)<sub>3</sub>](OTf)<sub>3</sub> ([Lu] = 10 mmol/L) in CD<sub>3</sub>CN (\* δ(H<sub>2</sub>O); # δ(CD<sub>3</sub>CN)).

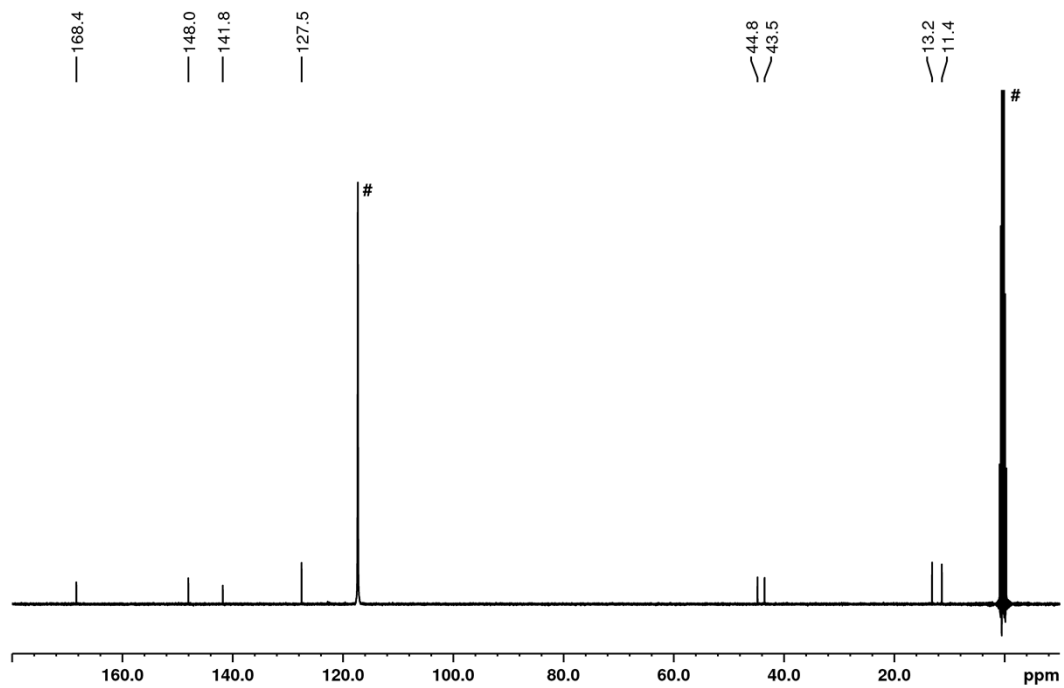

Figure S9 <sup>13</sup>C NMR spectrum (100.63 MHz, 300 K) of [Lu(Et-Pic)<sub>3</sub>](OTf)<sub>3</sub> ([Lu] = 10 mmol/L) in CD<sub>3</sub>CN (# δ(CD<sub>3</sub>CN)).



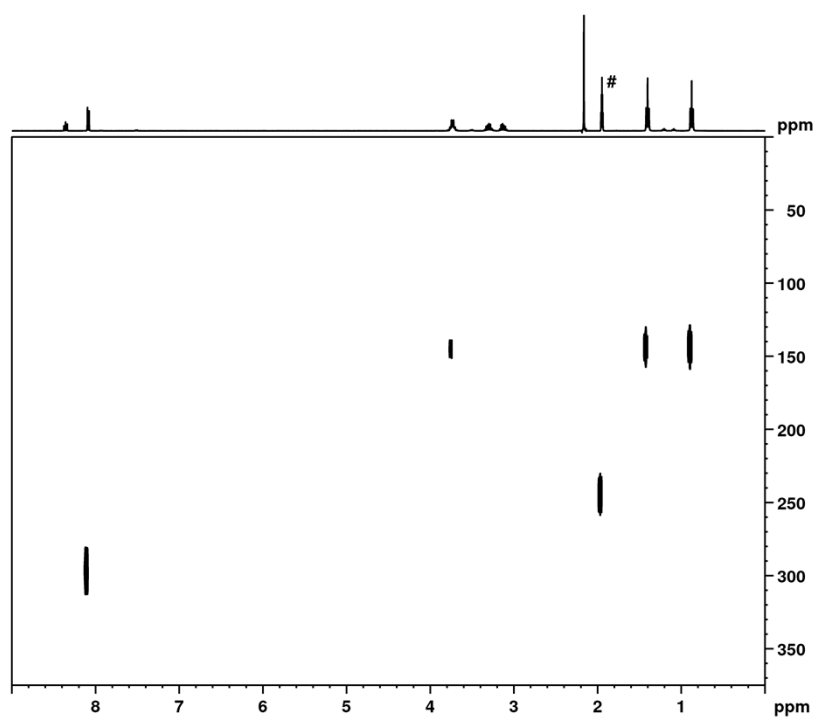

**Figure S10**  $^1\text{H}/^{15}\text{N}$  HMQC spectrum of  $[\text{Lu}(\text{Et-Pic})_3](\text{OTf})_3$  ( $[\text{Lu}] = 10 \text{ mmol/L}$ ) in  $\text{CD}_3\text{CN}$  ( $\delta(\text{CD}_3\text{CN})$ ).

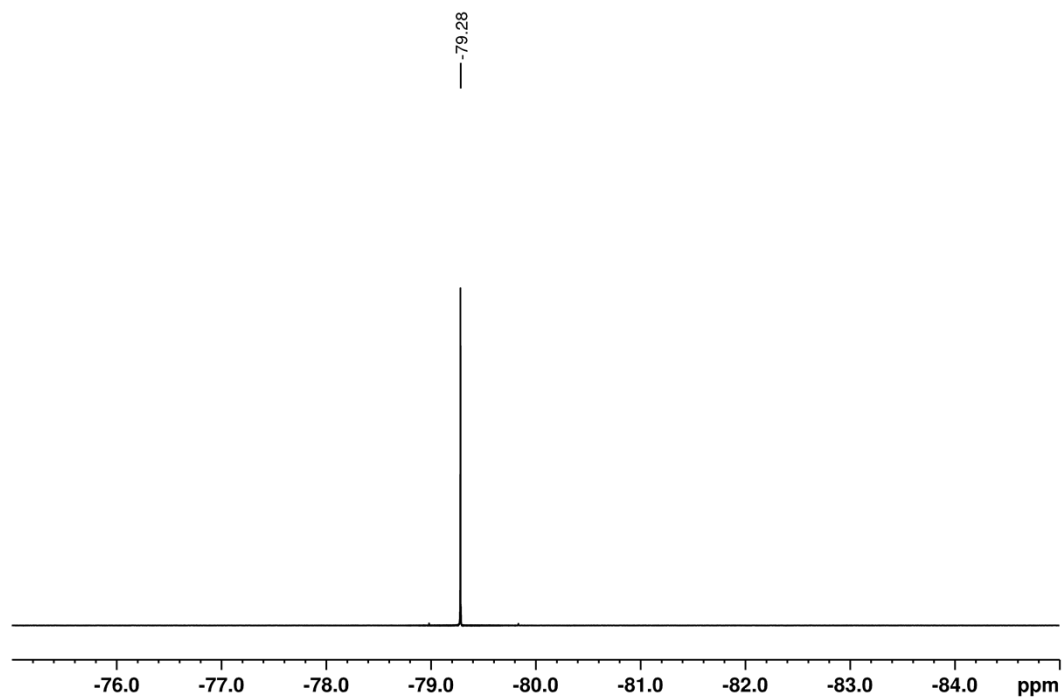

**Figure S11**  $^{19}\text{F}$  NMR spectrum (376.50 MHz, 300 K) of the  $\text{OTf}^-$  anion of  $[\text{Lu}(\text{Et-Pic})_3](\text{OTf})_3$  ( $[\text{Lu}] = 10 \text{ mmol/L}$ ) in  $\text{CD}_3\text{CN}$ .

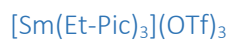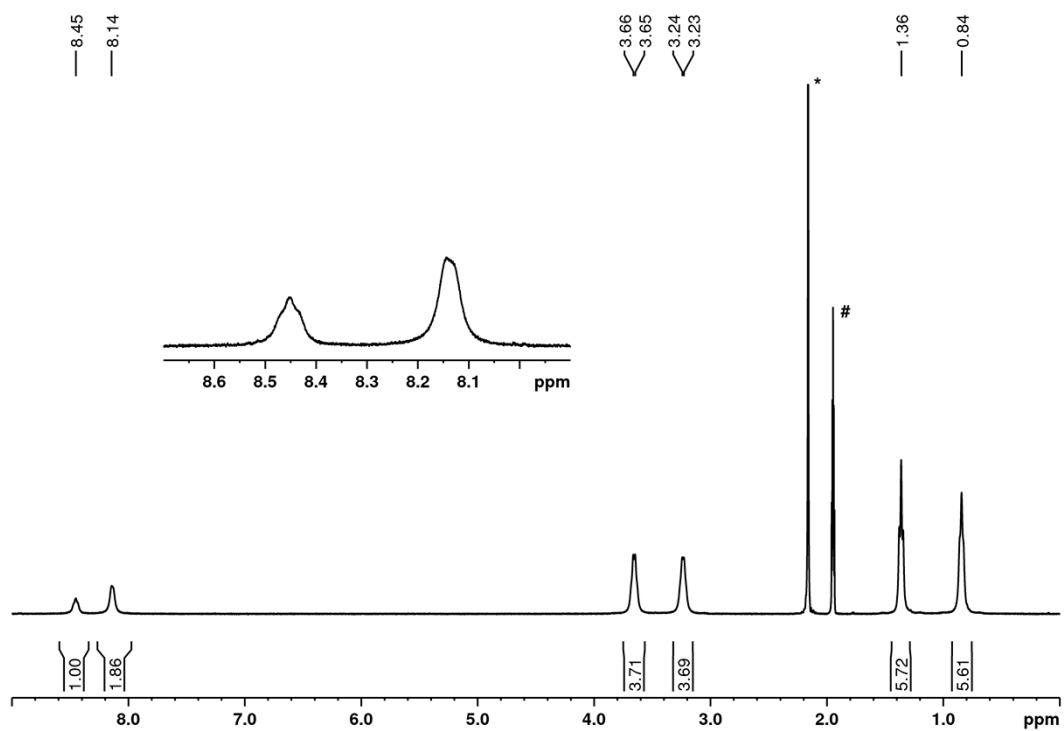

Figure S12 <sup>1</sup>H NMR spectrum (400.18 MHz, 300 K) of [Sm(Et-Pic)<sub>3</sub>](OTf)<sub>3</sub> ([Sm] = 10 mmol/L) in CD<sub>3</sub>CN (\* δ(H<sub>2</sub>O); # δ(CD<sub>3</sub>CN)).

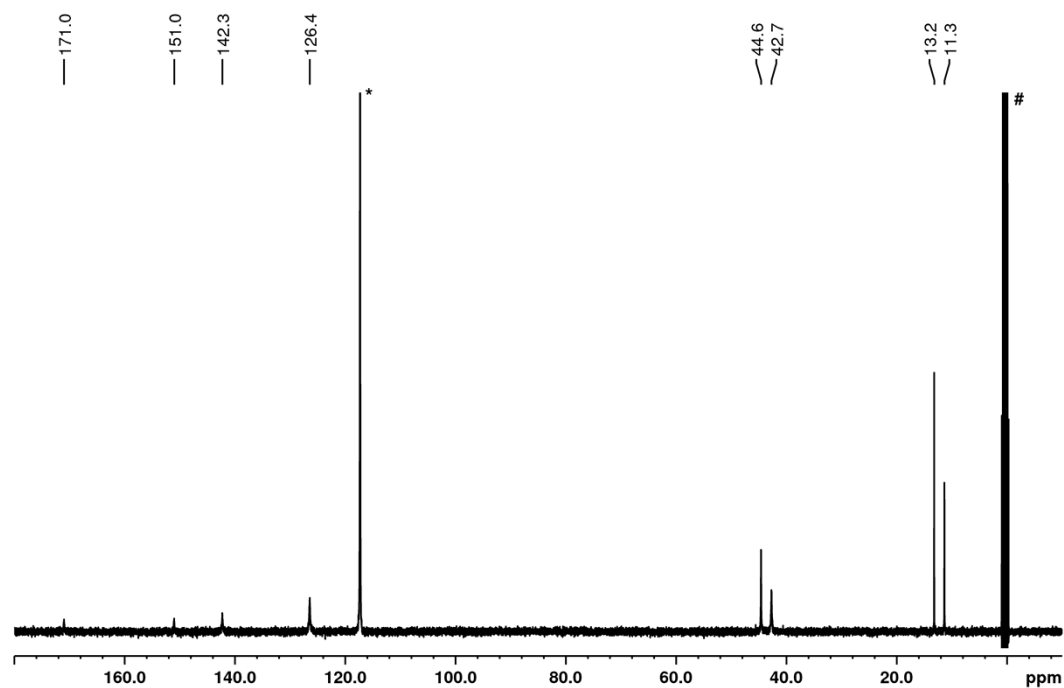

Figure S13 <sup>13</sup>C NMR spectrum (100.63 MHz, 300 K) of [Sm(Et-Pic)<sub>3</sub>](OTf)<sub>3</sub> ([Sm] = 10 mmol/L) in CD<sub>3</sub>CN (# δ(CD<sub>3</sub>CN)).

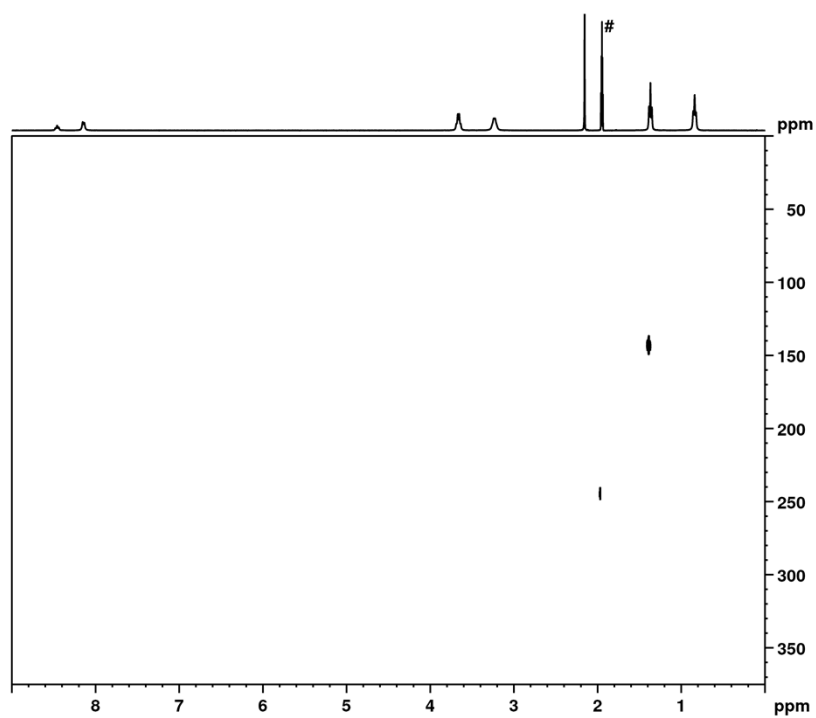

**Figure S14**  $^1\text{H}/^{15}\text{N}$  HMQC spectrum of  $[\text{Sm}(\text{Et-Pic})_3](\text{OTf})_3$  ( $[\text{Sm}] = 10 \text{ mmol/L}$ ) in  $\text{CD}_3\text{CN}$  ( $\# \delta(\text{CD}_3\text{CN})$ ).

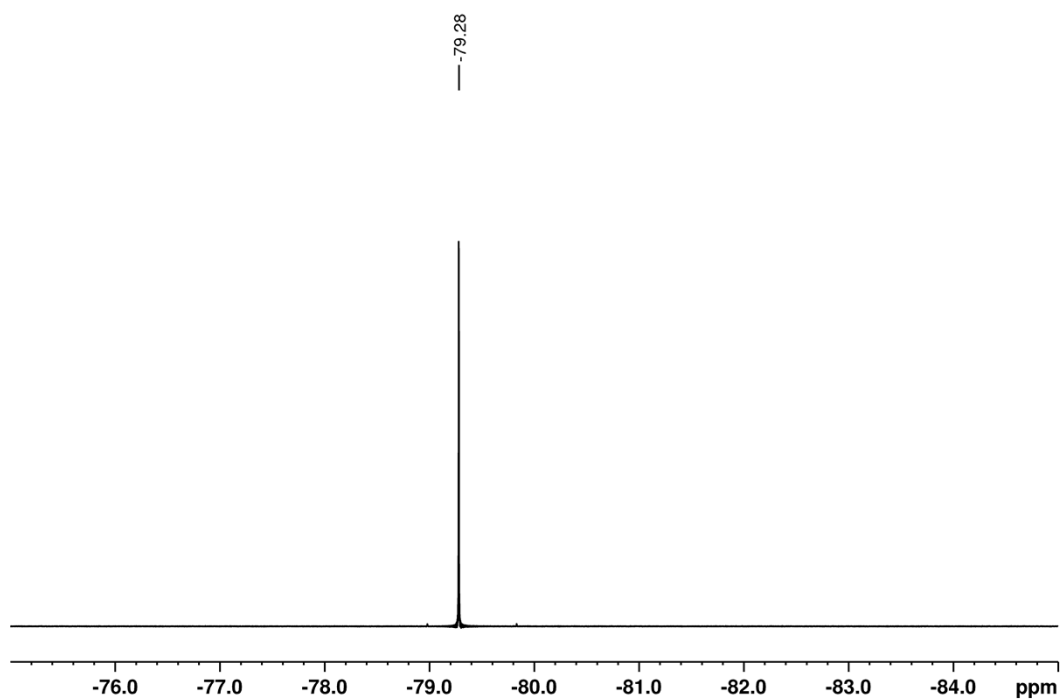

**Figure S15**  $^{19}\text{F}$  NMR spectrum (376.50 MHz, 300 K) of the  $\text{OTf}^-$  anion of  $[\text{Sm}(\text{Et-Pic})_3](\text{OTf})_3$  ( $[\text{Sm}] = 10 \text{ mmol/L}$ ) in  $\text{CD}_3\text{CN}$ .

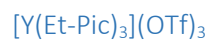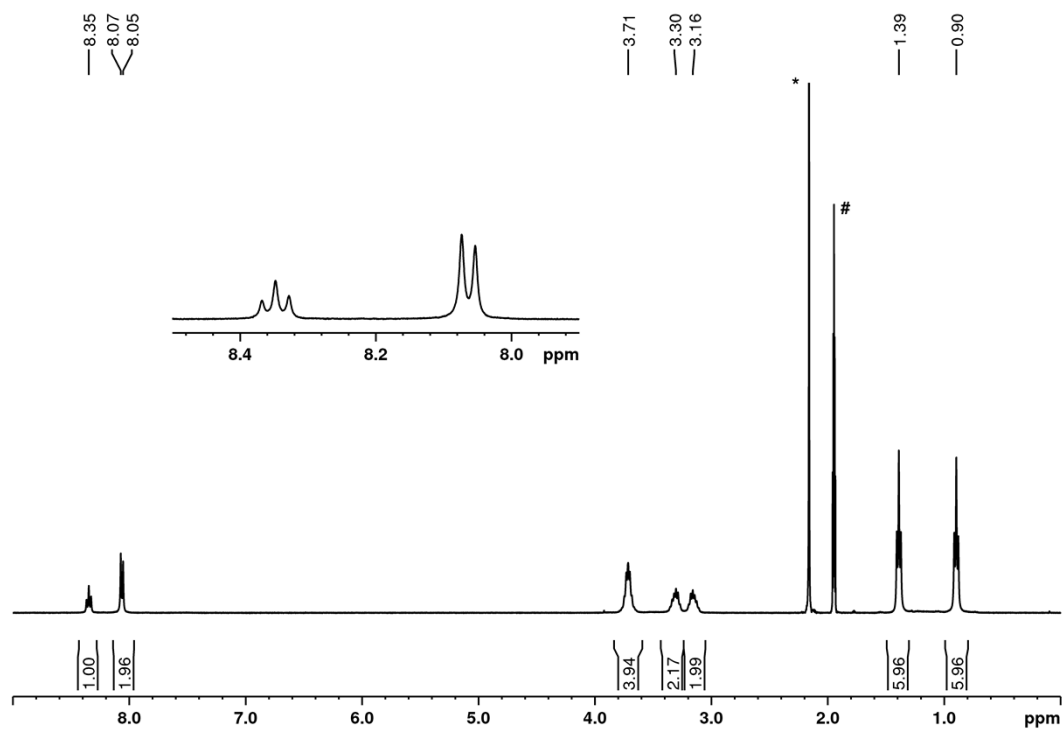

Figure S16  $^1H$  NMR spectrum (400.18 MHz, 300 K) of  $[Y(Et-Pic)_3](OTf)_3$  ( $[Y] = 10$  mmol/L) in  $CD_3CN$  (\*  $\delta(H_2O)$ ; #  $\delta(CD_3CN)$ ).

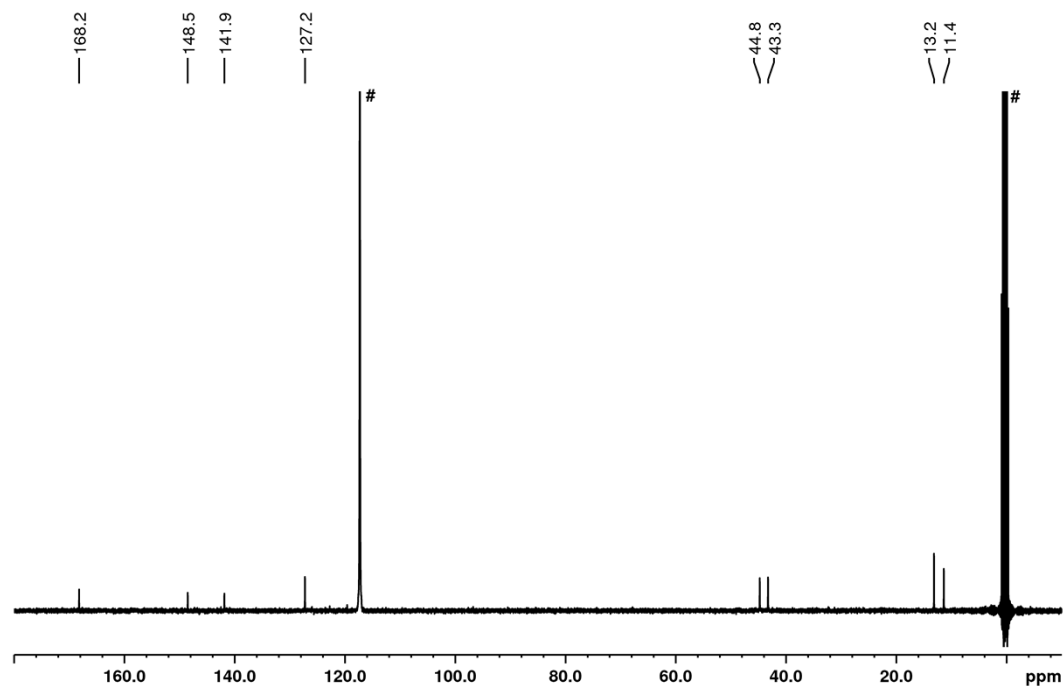

Figure S17  $^{13}C$  NMR spectrum (100.63 MHz, 300 K) of  $[Y(Et-Pic)_3](OTf)_3$  ( $[Y] = 10$  mmol/L) in  $CD_3CN$  (#  $\delta(CD_3CN)$ ).

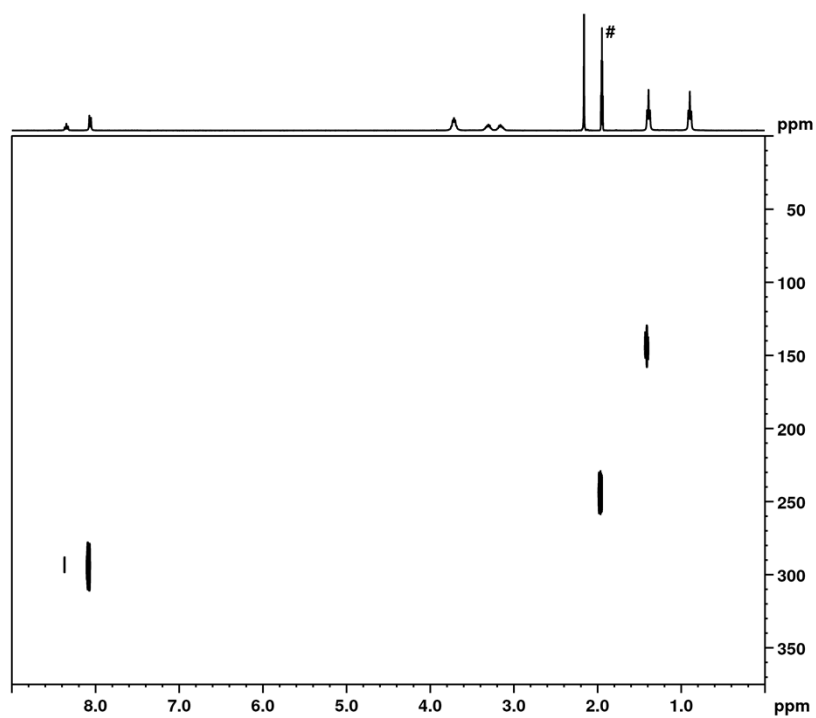

**Figure S18**  $^1\text{H}/^{15}\text{N}$  HMQC spectrum of  $[\text{Y}(\text{Et-Pic})_3](\text{OTf})_3$  ( $[\text{Y}] = 10 \text{ mmol/L}$  in  $\text{CD}_3\text{CN}$  (#  $\delta(\text{CD}_3\text{CN})$ ).

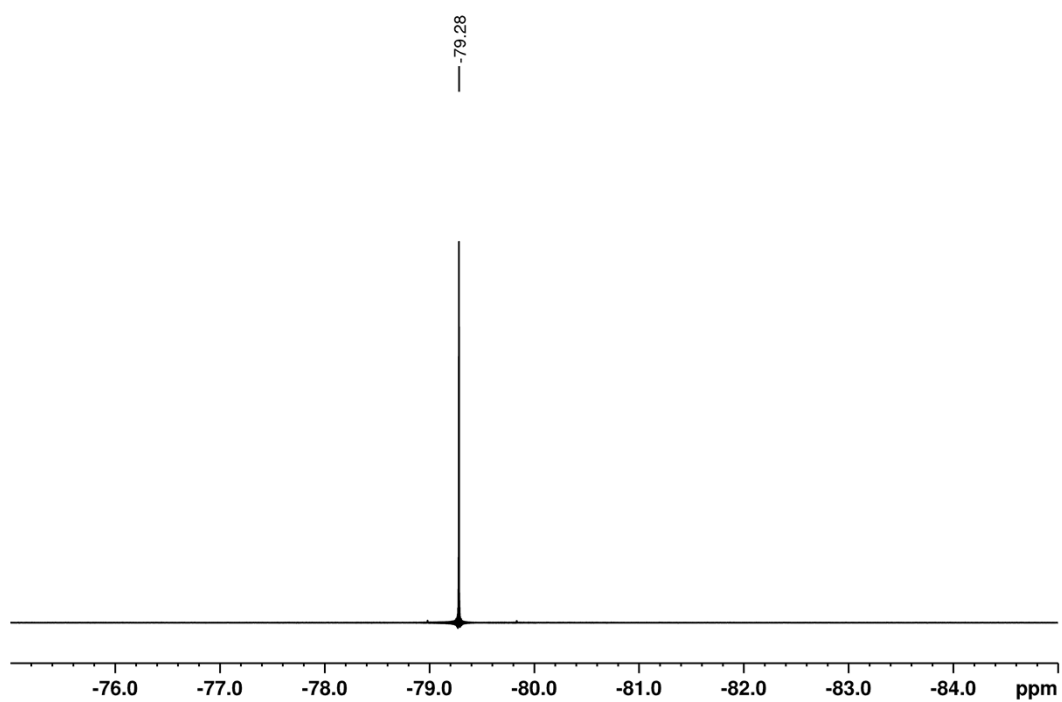

**Figure S19**  $^{19}\text{F}$  NMR spectrum (376.50 MHz, 300 K) of the  $\text{OTf}^-$  anion of  $[\text{Sm}(\text{Et-Pic})_3](\text{OTf})_3$  ( $[\text{Sm}] = 10 \text{ mmol/L}$ ) in  $\text{CD}_3\text{CN}$ .

## Comparison $\delta(^{13}\text{C})_{\text{aromat}}$ of $[\text{M}(\text{Et-Pic})_3]^{3+}$ and $[\text{M}(\text{nPr-BTP})_3]^{3+}$

Table S1 Comparison of  $^{13}\text{C}$  NMR shifts of the pyridine ring in  $[\text{M}(\text{Et-Pic})_3]^{3+}$  and  $[\text{M}(\text{nPr-BTP})_3]^{3+}$  ( $\text{M} = \text{Sm}, \text{Am}$ ) in respect to  $^{13}\text{C}$  shifts of the free ligand to highlight different trends between  $\text{Am}(\text{III})$  and  $\text{Ln}(\text{III})$  complexes.

|     | $[\text{M}(\text{Et-Pic})_3]^{3+}$ [1] |       |                           |       |                           | $[\text{M}(\text{nPr-BTP})_3]^{3+}$ [2,3] |       |                           |       |                           |
|-----|----------------------------------------|-------|---------------------------|-------|---------------------------|-------------------------------------------|-------|---------------------------|-------|---------------------------|
|     | none                                   | Sm    | $\Delta_{\text{Sm-none}}$ | Am    | $\Delta_{\text{Am-none}}$ | none                                      | Sm    | $\Delta_{\text{Am-none}}$ | Am    | $\Delta_{\text{Am-none}}$ |
| C-1 | 138.2                                  | 142.3 | 4.1                       | 141.4 | 3.2                       | 140.2                                     | 145.5 | 5.3                       | 149.7 | 9.5                       |
| C-2 | 122.4                                  | 126.4 | 4.0                       | 121.4 | -1.0                      | 126.7                                     | 129.1 | 2.4                       | 122.4 | -4.3                      |
| C-3 | 154.4                                  | 151.0 | -3.4                      | 153.5 | -0.9                      | 161.5                                     | 157.7 | -3.8                      | 165.5 | -3.8                      |

[1] in  $\text{CD}_3\text{CN}$

[2] in  $\text{CD}_3\text{OD}:\text{D}_2\text{O}$  3:1

[3] Values taken from Adam et al. *Dalton Trans.* **2013**, 42 (39), 14068-74. DOI: 10.1039/c3dt50953b

## Time-resolved laser fluorescence spectroscopy (TRLFS) data

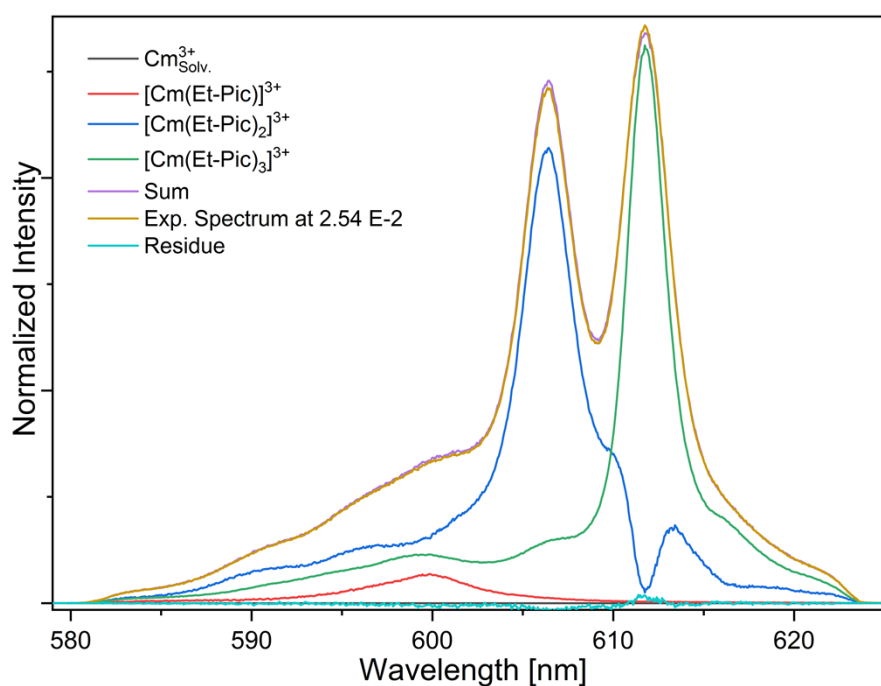

Figure S20 Peak deconvolution of the emission spectrum of  $\text{Cm}(\text{III})$  with  $2.54 \cdot 10^{-2}$  mol/L Et-Pic in acetonitrile containing 10 Vol.%  $\text{H}_2\text{O}$ .  $[\text{Cm}(\text{III})]_{\text{ini}} = 10^{-7}$  mol/L.

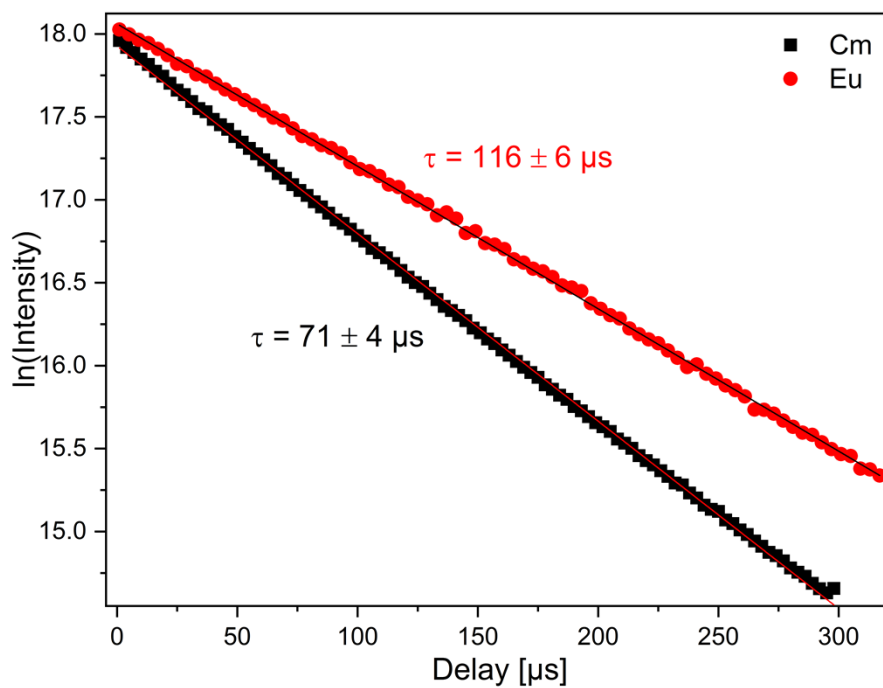

**Figure S21** Fluorescence lifetimes: Decrease of the fluorescence intensity of Cm(III) and Eu(III) in acetonitrile + 10 Vol.% H<sub>2</sub>O with increasing delay time ( $c(\text{Cm}) = 1 \times 10^{-7} \text{ mol L}^{-1}$ ,  $c(\text{Eu}) = 1 \times 10^{-5} \text{ mol L}^{-1}$ ).

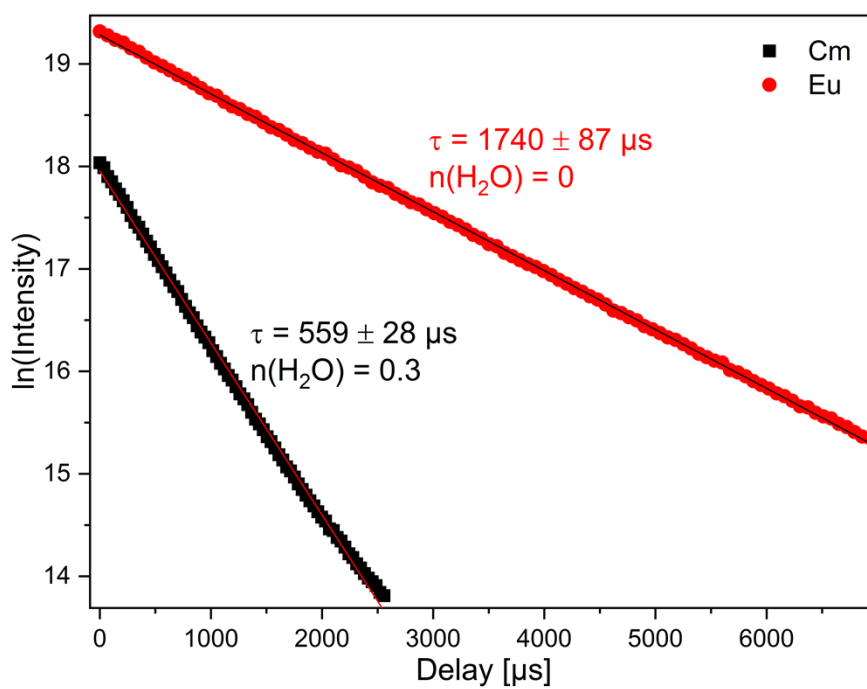

**Figure S22** Fluorescence lifetimes: Decrease of the fluorescence intensity of Cm(III) and Eu(III) in acetonitrile + 10 Vol.% H<sub>2</sub>O with increasing delay time ( $c(\text{Et-Pic}) = 0.2 \text{ mol L}^{-1}$ ;  $c(\text{Cm}) = 1 \times 10^{-7} \text{ mol L}^{-1}$ ,  $c(\text{Eu}) = 1 \times 10^{-5} \text{ mol L}^{-1}$ ).

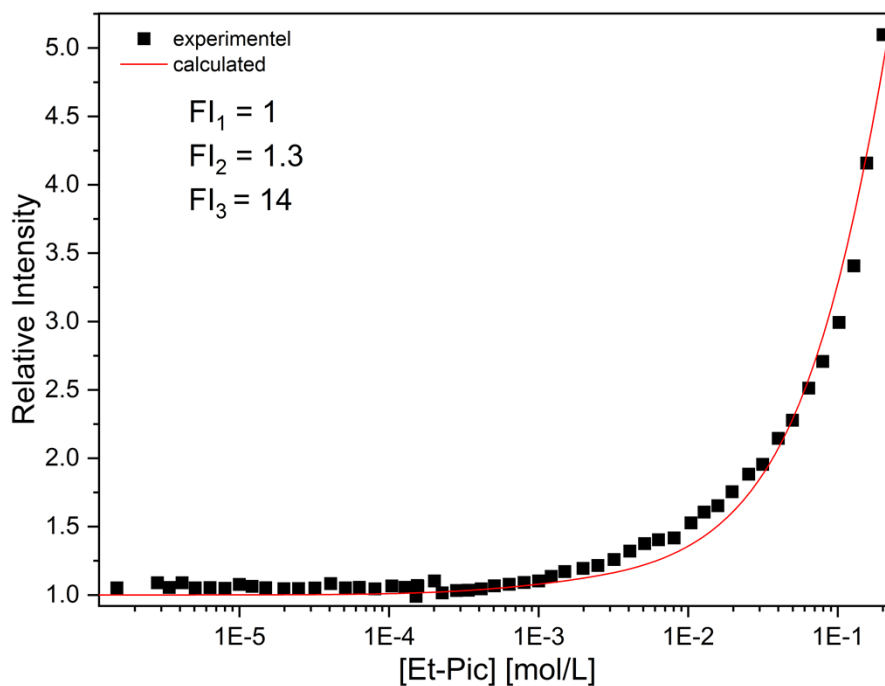

**Figure S23** Evolution of the relative fluorescence intensity for the complexation of Cm(III) with Et-Pic in acetonitrile + 10 Vol.%  $H_2O$  as a function of the Et-Pic concentration ( $c(Cm(III))_{ini} = 1 \times 10^{-7} \text{ mol L}^{-1}$ ).

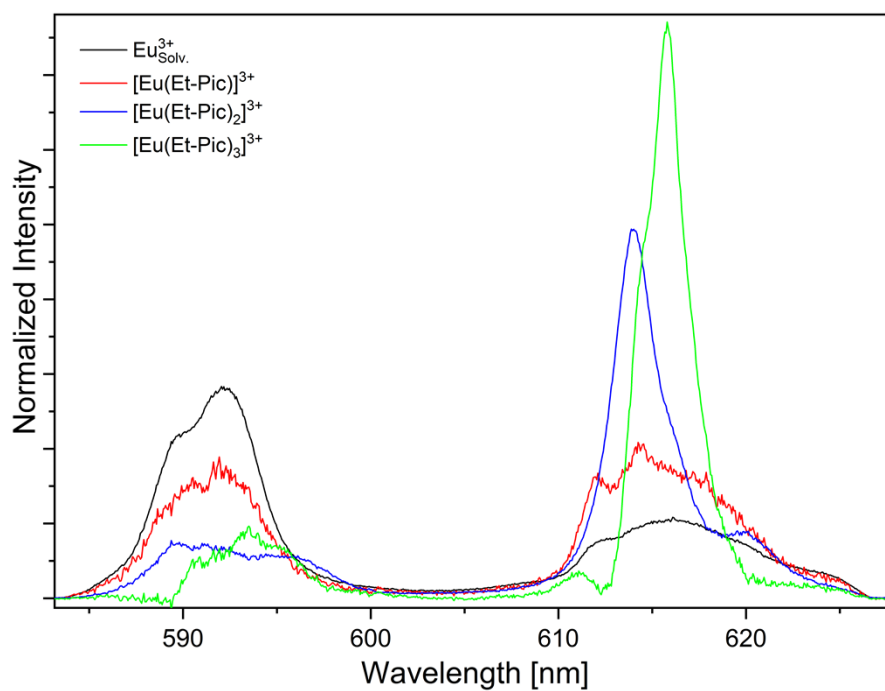

**Figure S24** Single component spectra of the Eu(III) solvent species and the  $[Eu(Et-Pic)_n]^{3+}$  complexes ( $n = 1-3$ ).



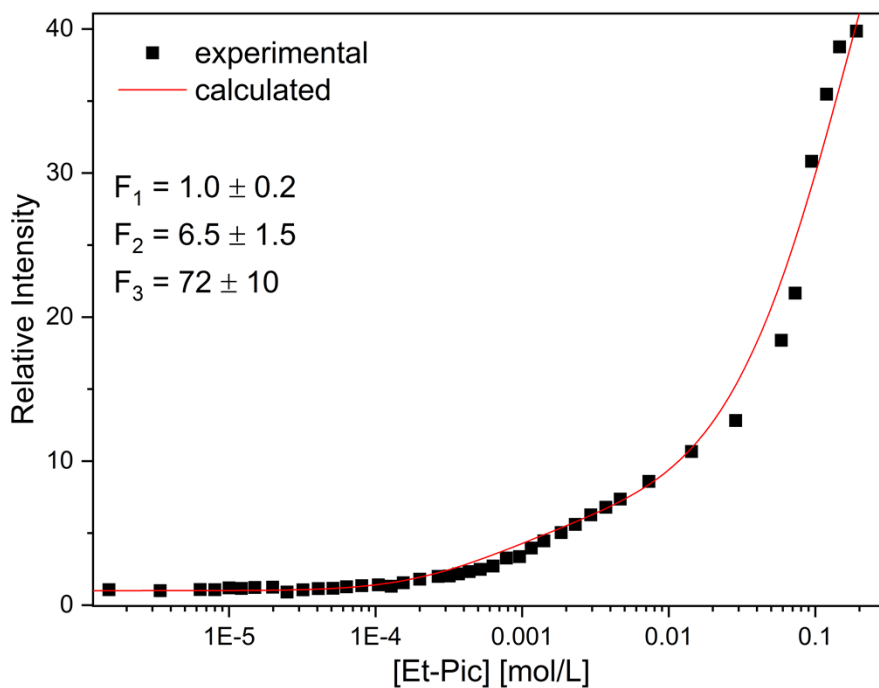

**Figure S25** Evolution of the relative fluorescence intensity for the complexation of Eu(III) with Et-Pic in acetonitrile + 10 Vol.% H<sub>2</sub>O as a function of the Et-Pic concentration ( $c(\text{Eu(III)})_{\text{ini}} = 1 \times 10^{-5} \text{ mol L}^{-1}$ ).

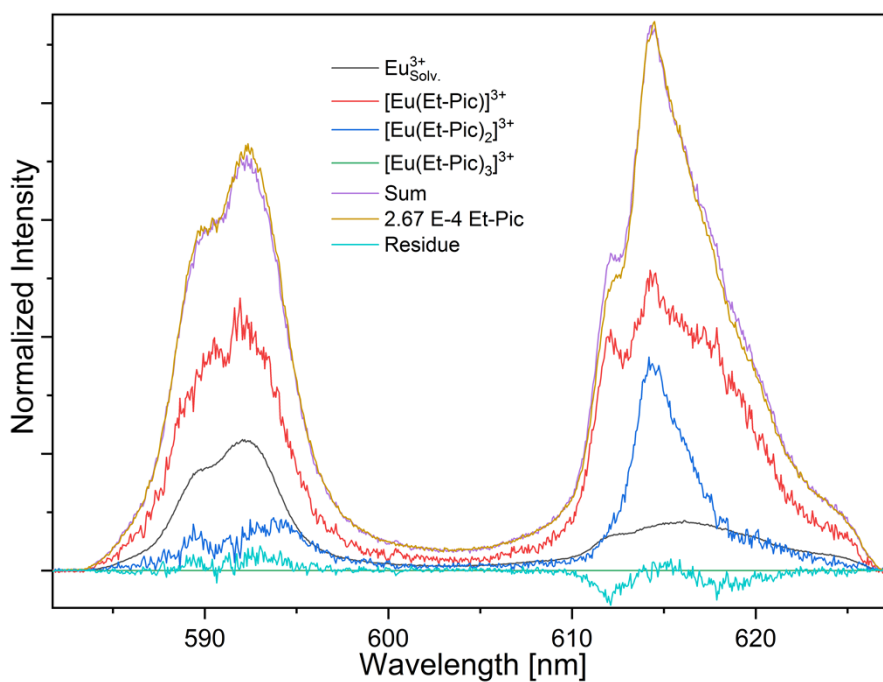

**Figure S26** Peak deconvolution of the emission spectrum of Eu(III) with  $2.67 \cdot 10^{-4} \text{ mol/L}$  Et-Pic in acetonitrile containing 10 Vol.% H<sub>2</sub>O.  $[\text{Eu(III)}]_{\text{ini}} = 10^{-5} \text{ mol/L}$ .

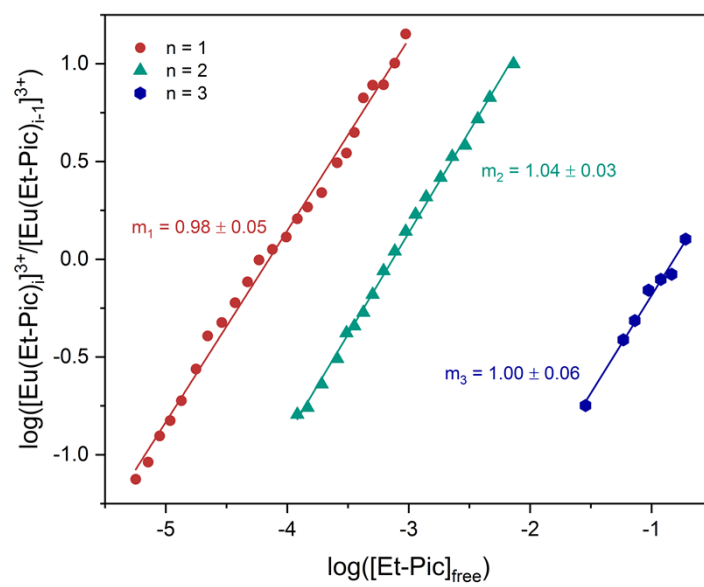

Figure S27 Double logarithmic plot of the concentration ratios of  $[\text{Eu}(\text{Et-Pic})_n]^{3+} / [\text{Eu}(\text{Et-Pic})_{n-1}]^{3+}$  ( $n = 1 - 3$ ) as a function of the free Et-Pic concentration.
